# Supplementary material
Source: PubMed Central journal article supplement (PMC5111671)
Supplement: pnas.1610533113.sapp.pdf [file pnas.1610533113.sapp.pdf]

## Supporting Information

### MATERIALS AND METHODS

**Plasmid construction.** The strains and plasmids used in this study are listed in Table S5. The primers used in this study are listed in Table S6. The integrity of all PCR-derived constructs was verified by sequencing. The plasmids pKH239, pKH241, and pKH274 are suicide vectors based on pRL277 (1) used to cleanly delete the coding regions of the genes *alr2902*, *alr3234*, and *asl1930*, respectively. Regions up- and downstream of *alr2902*, *alr3234*, and *asl1930* were amplified by PCR from *Anabaena* chromosomal DNA with the primer pairs d2902-up-F and d2902-up-R and d2902-dn-F and d2902-dn-R, d3234-up-F and d3234-up-R and d3234-dn-F and d3234-dn-R, and 1930-up-F and 1930-up-R and 1930-dn-F and 1930-dn-R, respectively. The up- and downstream regions were fused together by overlap extension PCR (2) and individually cloned as *BglII-SacI* fragments into the same sites of pRL277.

The plasmids pPJAV298, pPJAV299, pPJAV300, pPJAV301, pPJAV302, pPJAV303, and pPJAV304 are mobilizable shuttle vectors based on pAM504 carrying seven alleles of *hetP* lacking a range of amino acids:  $\Delta 26-159$ ,  $\Delta 51-159$ ,  $\Delta 69-159$ ,  $\Delta 76-159$ ,  $\Delta 101-159$ ,  $\Delta 126-159$ , and native length *hetP*, respectively, expressed by the *hetP* promoter. Fragments of the *hetP* coding region were amplified via PCR using *Anabaena* chromosomal DNA as a template. The upstream primer used to create these fragments was *hetP*-up-*XhoI* and the following downstream primers were used to make specific *hetP* alleles: *hetP*-25aa-*EcoRV*-R for pPJAV298; *hetP*-50aa-*EcoRV*-R for pPJAV299; *hetP*-68aa-*EcoRV*-R for pPJAV300; *hetP*-75aa-*EcoRV*-R for pPJAV301; *hetP*-100aa-*EcoRV*-R for pPJAV302; *hetP*-125aa-*EcoRV*-R for pPJAV303; and *hetP*-159aa-*EcoRV*-R for pPJAV304. The products were individually cloned as *XhoI-EcoRV* fragments into the *Sall-SmaI* sites in pAM504 (3).

The plasmids pPJAV305, pPJAV306, and pPJAV307 are mobilizable shuttle vectors based on pAM504 carrying alleles of *hetP* encoding C36A, C95A, and C36A/C95A substitutions, respectively, expressed by the *hetP* promoter. The fragments used to make base substitutions were amplified via overlap extension PCR using *Anabaena* chromosomal DNA as a template. The outer primers used to create the constructs were *hetP*-up-*XhoI* and *hetP*-159aa-*EcoRV*-R. The following internal primer pairs were used to create specific *hetP* alleles: *hetPC36A-F* M475L and *hetPC36A-R* M475L for pPJAV305; *hetPC95A-F* M475L and *hetPC95A-R* M475L for pPJAV306; and, using pPJAV238 as a template, *hetPC95A-F* M475L and *hetPC95A-R* M475L for pPJAV307. These were cloned as *XhoI-EcoRV* fragments into the *Sall-SmaI* sites in pAM504.

Plasmid pPJAV327 is a suicide vector based on pRL277 used to reintroduce the native *hetP* allele into the *hetP* locus. A fragment containing regions up- and downstream of *hetP* as well as the *hetP* coding sequence were amplified by PCR using *Anabaena* chromosomal DNA as a template with the primers *del-hetP*-up-F and *del-hetP*-up-R. This product was cloned into the *NruI* site in pRL277.

The plasmids pPJAV330, pPJAV331, and pPJAV332 are mobilizable shuttle vectors based on pAM504 carrying transcriptional fusions with the promoters of *asl1930*, *alr2902*, and *alr3234* to *gfp*, respectively. The promoter regions of *asl1930*, *alr2902*, and

*alr3234* were amplified by PCR using *Anabaena* chromosomal DNA as a template with the primer pairs Pas11930-XhoI-F M475L and Pas11930-R M475L, Palr2902-XhoI-F M475L and Palr2902-R M475L, and Palr3234-XhoI-F M475L and Palr3234-R M475L, respectively. The products were individually cloned into the *Sma*I site in pAM1956 and screened for directionality with PCR (4).

The plasmids pPJAV353, pPJAV354, and pPJAV358 are mobilizable shuttle vectors based on pAM504 carrying transcriptional fusions of the *hetP* promoter to 68 amino acid-long alleles of *asl1930*, *alr2902*, and *alr3234* that share homology with *hetP*. The fragments used to make base substitutions were amplified via overlap extension PCR using *Anabaena* chromosomal DNA as a template. The primers hetP-up-XhoI and PhetP-R were used to amplify the *hetP* promoter. The following primer pairs were used to amplify the desired alleles of *asl1930*, *alr2902*, and *alr3234*: *asl1930*-68aa-F and *asl1930*-68aa-R for pPJAV353; *alr2902*-68aa-F and *alr2902*-68aa-R for pPJAV354; and *alr3234*-68aa-F and *alr3234*-68aa-R for pPJAV358. The products were individually cloned into the *Sma*I site in pAM504 and screened for directionality with PCR to insure that all inserts transcribed in the same direction.

The plasmids pT18 C-link amp, pT18 N-link amp, pT25 C-link kan, and pT25 N-link kan are vectors created by the addition of nucleotides encoding an 11 amino acid linker (GSAGSAAGSGG) to pUT18C, pUT18, pKT25, and pKNT25, respectively (5). pT18 C-link amp was built by PCR amplifying the T18 region of pUT18C with the primers T18C-HindIII F and T18C-link-PstI R. The product was cloned as a *Hind*III-*Pst*I fragment into the same sites of pUT18C. pT18 N-link amp was built by PCR amplifying the T18 region of pUT18 with the primers T18N-link-EcoRI F and T18N-EagI R. The product was cloned as an *Eco*RI-*Eag*I fragment into the same sites of pUT18. pT25 C-link kan was built by PCR amplifying the T25 region of pKT25 with the primers T25C-HindIII F and T25C-link-PstI R. The product was cloned as a *Hind*III-*Pst*I fragment into the same sites of pKT25. pT25 N-link kan was built by PCR amplifying the T25 region of pKNT25 with the primers T25N-NheI F and T25N-link-EcoRI. The product was cloned as a *Nhe*I-*Eco*RI fragment into the same sites of pKNT25 to create the plasmids pT18 C-link amp, pT18 N-link amp, pT25 C-link kan, and pT25 N-link kan, respectively.

The plasmids pRO176, pRO180, pRO184, and pRO188 are vectors based on pT18-C-link carrying C-terminal translational fusions of *hetP*, *asl1930*, *alr2902*, and *alr3234*, respectively, with the T18 *cyaA* domain. The coding regions of *hetP*, *asl1930*, *alr2902*, and *alr3234* were amplified from *Anabaena* chromosomal DNA with the primer pairs Bac2-C-hetP XbaI F and Bac2-C-hetP KpnI R, Bac2-C-*asl1930* XbaI F and Bac2-C-*asl1930* KpnI R, Bac2-C-*alr2902* XbaI F and Bac2-C-*alr2902* KpnI R, and Bac2-C-*alr3234* XbaI F and Bac2-C-*alr3234* KpnI R, respectively. The products were cloned as *Xba*I-*Kpn*I fragments into the same sites in pT18-C-link to create pRO176, pRO180, pRO184, and pRO188.

The plasmids pRO177, pRO181, pRO185, and pRO189 are vectors based on pT18-N-link carrying N-terminal translational fusions of *hetP*, *asl1930*, *alr2902*, and *alr3234*, respectively, with the T18 *cyaA* domain. The coding regions of *hetP*, *asl1930*, *alr2902*, and *alr3234* were amplified from *Anabaena* chromosomal DNA with the primer pairs Bac2-N-hetP XbaI F and Bac2-N-hetP KpnI R, Bac2-N-*asl1930* XbaI F and Bac2-N-*asl1930* KpnI R, Bac2-N-*alr2902* XbaI F and Bac2-N-*alr2902* KpnI R, and Bac2-N-*alr3234* XbaI F and Bac2-N-*alr3234* KpnI R, respectively. The products were cloned as

*Xba*I-*Kpn*I fragments into the same sites in pT18-N-link to create pRO177, pRO181, pRO185, and pRO189.

The plasmids pRO178, pRO182, pRO186, and pRO190 are vectors based on pT25-C-link carrying C-terminal translational fusions of *hetP*, *asl1930*, *alr2902*, and *alr3234*, respectively, with the T25 *cyaA* domain. The coding regions of *hetP*, *asl1930*, *alr2902*, and *alr3234* were amplified from *Anabaena* chromosomal DNA with the primer pairs Bac2-C-*hetP* *Xba*I F and Bac2-C-*hetP* *Kpn*I R, Bac2-C-*asl1930* *Xba*I F and Bac2-C-*asl1930* *Kpn*I R, Bac2-C-*alr2902* *Xba*I F and Bac2-C-*alr2902* *Kpn*I R, and Bac2-C-*alr3234* *Xba*I F and Bac2-C-*alr3234* *Kpn*I R, respectively. The products were cloned as *Xba*I-*Kpn*I fragments into the same sites in pT25-C-link to create pRO178, pRO182, pRO186, and pRO190.

The plasmids pRO179, pRO183, pRO187, and pRO191 are vectors based on pT25-N-link carrying N-terminal translational fusions of *hetP*, *asl1930*, *alr2902*, and *alr3234*, respectively, with the T25 *cyaA* domain. The coding regions of *hetP*, *asl1930*, *alr2902*, and *alr3234* were amplified from *Anabaena* chromosomal DNA with the primer pairs Bac2-N-*hetP* *Xba*I F and Bac2-N-*hetP* *Kpn*I R, Bac2-N-*asl1930* *Xba*I F and Bac2-N-*asl1930* *Kpn*I R, Bac2-N-*alr2902* *Xba*I F and Bac2-N-*alr2902* *Kpn*I R, and Bac2-N-*alr3234* *Xba*I F and Bac2-N-*alr3234* *Kpn*I R, respectively. The products were cloned as *Xba*I-*Kpn*I fragments into the same sites in pT25-N-link to create pRO179, pRO183, pRO187, and pRO191.

**Strain construction.** All *Anabaena* strains used in this study are listed in Table S4. Clean, unmarked deletions of the *asl1930*, *alr2902*, and *alr3234* genes were introduced into either the wild type or UHM158, or resulting derivatives, using the plasmids pKH239, pKH241, or pKH274, respectively, in the order listed. To create UHM342, the *hetP* gene was reintroduced into the native locus in strain UHM333 using plasmid pPJAV327. Mutant strains were created as previously described (6-8). To confirm the mutant constructions, primers flanking the mutation and located outside the region of *Anabaena* DNA used to make the mutations were used to amplify the region of the intended mutation. The resulting sizes of the PCR products, as well as sensitivity to spectinomycin and streptomycin, were used to confirm that the desired deletions had been introduced. The primer pairs used to confirm deletion of the *hetP*, *asl1930*, *alr2902*, and *alr3234* genes were del-*hetP*-up-out and del-*hetP*-dn-out, 1930-up-out and 1930-dn-out, 2902-up-out and 2902-dn-out, and 3234-up-out and 3234-dn-out, respectively.

Replacement of the coding region of *patS* with an  $\Omega$  interposon that confers resistance to spectinomycin and streptomycin in UHM158 with the plasmid pSMC164 was accomplished by allelic exchange as described above. Strain UHM334 with mutations in the *hetP* and *patS* genes was verified by PCR with the primer sets del-*hetP*-up-out and del-*hetP*-dn-out and *patS*for and *patS*rev, respectively, which anneal outside of the regions used to make the deletions.

**Alcian blue staining and acetylene reduction assays.** Heterocyst-specific exopolysaccharide was stained with alcian blue as previously described (9, 10). Aerobic acetylene reduction assays were performed as previously described (11, 12).

**Phylogenetic, structural, and statistical analyses.** Amino acid sequences were aligned using the BLOSUM62 exchange weights matrix within the PProfile ALIGNment (PRALINE) multiple sequence alignment application (13, 14). Phylogenetic analysis was performed using the Maximum Likelihood method based on the JTT matrix-based model

in MEGA6 (15, 16). The analysis included 17 amino acid sequences with 1000 bootstrap replicates. Tertiary structure prediction utilized the RaptorX software (17).

To mathematically assess epistasis, the fitness of each mutant was determined by its ability to differentiate heterocysts compared to the levels produced by the wild type (18). After calculating fitness (the percentage of heterocysts produced divided by the corresponding value for the wild type), epistasis ( $e$ ) was calculated using a published two-allele two-phenotype equation ( $e = \ln_{AB} \times \ln_{ab} - \ln_{aB} \times \ln_{Ab}$ ) in which the fitness values obtained for each strain are represented by  $AB$  (wild type),  $Ab$  (mutant for one gene),  $aB$  (mutant for the other gene),  $ab$  (the double mutant) because the interaction of only two loci was compared in any given treatment (19). Multiple regression analysis was performed using the R statistical package (20).

**Pixel intensity measurement of images.** Pixel intensity was measured using Adobe Photoshop by sampling 10-pixel diameter regions of interest from either the interior of 10 contiguous cells or 10 adjacent points in the background. The green channel pixel intensities were averaged, standard deviation was calculated, and significance assessed by  $t$ -test.

**Heterocyst commitment assays.** *Anabaena* strains were grown on solid BG-11 media supplemented with 5 mM ammonia for 48 hours and then transferred to 100 ml of liquid BG-11 media supplemented with 6 mM ammonia and grown under standard growth conditions for 24 hours. Heterocyst development was induced by washing each culture 3 times with BG-11<sub>0</sub> media, which lacks a combined nitrogen source. Washed cells were resuspended in 100 ml of BG-11<sub>0</sub> and grown under standard growth conditions for the remainder of the experiment. To test for commitment, a 2 ml sample was removed from the parent culture and transferred to a culture tube and ammonia was added to a final concentration of 6 mM at the time points indicated. Heterocyst development was assessed 24-48 hours later by counting morphologically distinct heterocysts. Percentages were calculated as the number of morphologically distinct heterocyst cells per 500 cells total. All results are the average of 3 replicates. Error bars represent the standard deviation.

**Bacterial two-hybrid assays and  $\beta$ -galactosidase assays.** Bacterial two-hybrid assays were performed as described (21, 22). Plasmids were introduced into competent DHM1 cells and transformants were selected on plates supplemented with ampicillin and kanamycin. Following overnight growth, single-colony transformants were inoculated into 2 ml LB cultures and incubated at 37°C with shaking. Cultures were grown to OD<sub>600</sub> ~1.6 and 10  $\mu$ l was spot inoculated onto LB plates supplemented with 40  $\mu$ g/ml X-gal, 1 mM IPTG, ampicillin, and kanamycin and incubated for 18 h at 30°C.  $\beta$ -galactosidase activity was visually assessed and all assays were photodocumented. LB cultures for quantitative bacterial two-hybrid assays were grown to mid-log-phase (OD<sub>600</sub> ~0.5) at 37°C with shaking and one ml was harvested and resuspended in an equal volume of Z-buffer.  $\beta$ -galactosidase activity was quantified as previously described and is presented as the average of three independent cultures (23). Error bars represent the standard deviation.

**RNA isolation and first strand cDNA synthesis.** Cells were grown in BG-11 media supplemented with ammonia and stepped down to media lacking combined nitrogen as previously described (24). Duplicate samples of approximately 2 million cells were harvested at times 0, 6, 12, 18, or 24 hours after stepdown. Cell pellets were

resuspended in 1ml of TRIzol reagent. Using a Misonex S-4000 probe sonicator, each sample was sonicated at 15% for 20 seconds for four pulses with 3 min on ice between each pulse. After addition of chloroform to the TRIzol mixture, the organic phase was transferred to Qiagen RNAeasy columns and the RNA was purified according to manufacturer's instructions. Total RNA was DNaseI treated on column for 30 min at room temperature. The RNA quality was evaluated with an Agilent RNA TapeStation on a R6K Screen tape. First strand cDNA synthesis was conducted using the SuperScriptIII System with random hexamers and varying amounts of RNA template (70-1500 ng) according to manufacturer's instructions.

**RT-qPCR.** Standard curves were generated to validate each target and housekeeping gene using eight 1:5 serial dilutions of *Anabaena* chromosomal DNA starting at 4 ng. Triplicate reactions were assembled manually and consisted of 1x LightCycler 480 SYBR Green I Master Mix, 0.5  $\mu$ M of each forward/reverse primer pair (NrnpAF/NrnpAR, asl1930-qF/asl1930-qR, alr2902-qF/alr2902-qR, alr3234-qF/alr3234-qR, hetP-qF/hetP-qR) in a final reaction volume of 15  $\mu$ L. The resulting standard curves show efficiencies for all primer sets between 91.0-94.5% ( $r^2 > 0.998$ ). RT-qPCR reactions were assembled manually and contained 1x LightCycler 480 SYBR Green I Master Mix, 0.5  $\mu$ M of each forward/reverse primer, and 0.6  $\mu$ L of each cDNA reaction in a final volume of 15  $\mu$ L. All standards and samples were run on a Roche LC480II using the following reaction profile: an initial denaturation at 95°C for 15 min, followed by 45 cycles of 95°C for 15 s, 60°C for 30 s, 72°C for 30 s, and a melting curve cycle of 65-95°C. Negative controls (no template cDNA) were included and a melting curve analysis was performed in all cases, which always yielded a single product. The relative quantities of each sample were calculated using the  $\Delta\Delta C_t$  method, taking into account each primer's specific efficiency calculated from the standard curves, as previously described (25). All values were normalized to *mpA* expression because this gene was shown to be consistently expressed across growth conditions (26).

## References cited

1. Black TA, Cai Y, & Wolk CP (1993) Spatial expression and autoregulation of *hetR*, a gene involved in the control of heterocyst development in *Anabaena*. *Mol. Microbiol.* 9:77-84.
2. Higuchi R, Krummel B, & Saiki RK (1988) A general method of *in vitro* preparation and specific mutagenesis of DNA fragments: study of protein and DNA interactions. *Nucleic Acids Res.* 16:7351-7367.
3. Wei T-F, Ramasubramanian R, & Golden JW (1994) *Anabaena* sp. strain PCC 7120 *ntcA* gene required for growth on nitrate and heterocyst development. *J. Bacteriol.* 176:4473-4482.
4. Yoon H-S & Golden JW (1998) Heterocyst pattern formation controlled by a diffusible peptide. *Science* 282:935-938.

5. Blair KM, Turner L, Winkelman JT, Berg HC, & Kearns DB (2008) A molecular clutch disables flagella in the *Bacillus subtilis* biofilm. *Science* 320(5883):1636-1638.
6. Cai Y & Wolk CP (1990) Use of a conditionally lethal gene in *Anabaena* sp. strain PCC 7120 to select for double recombinants and to entrap insertion sequences. *J. Bacteriol.* 172:3138-3145.
7. Callahan SM & Buikema WJ (2001) The role of HetN in maintenance of the heterocyst pattern in *Anabaena* sp. PCC 7120. *Mol. Microbiol.* 40:941-950.
8. Orozco CC, Risser DD, & Callahan SM (2006) Epistasis analysis of four genes from *Anabaena* sp. strain PCC 7120 suggests a connection between PatA and PatS in heterocyst pattern formation. *J. Bacteriol.* 188(5):1808-1816.
9. Higa KC & Callahan SM (2010) Ectopic expression of *hetP* can partially bypass the need for *hetR* in heterocyst differentiation by *Anabaena* sp strain PCC 7120. *Mol. Microbiol.* 77:562-574.
10. McManus JFA & Mowry RW (1960) *Staining Methods. Histologic and Histochemical* (Harper (Hoeber), New York) 1 Ed p 423.
11. Ernst A, *et al.* (1992) Synthesis of nitrogenase in mutants of the cyanobacterium *Anabaena* sp. strain PCC 7120 affected in heterocyst development or metabolism. *J. Bacteriol.* 174:6025-6032.
12. Videau P, *et al.* (2014) Expanding the direct HetR regulon in *Anabaena* sp. strain PCC 7120. *J. Bacteriol.* 196(5):1113-1121.
13. Simossis VA & Heringa J (2005) PRALINE: a multiple sequence alignment toolbox that integrates homology-extended and secondary structure information. *Nucleic Acids Res.* 33(Web Server issue):W289-W294.
14. Simossis VA, Kleinjung J, & Heringa J (2005) Homology-extended sequence alignment. *Nucleic Acids Res.* 33(3):816-824.
15. Jones DT, Taylor WR, & Thornton JM (1992) The rapid generation of mutation data matrices from protein sequences. *Comput. Appl. Biosci.* 8:275-282.
16. Tamura K, Stecher G, Peterson D, Filiski A, & Kumar S (2013) MEGA6: Molecular evolutionary genetics analysis version 6.0. *Mol. Biol. Evol.* 30:2725-2729.
17. Källberg M, *et al.* (2012) Template-based protein structure modeling using the RaptorX web server. *Nat Protoc* 7(8):1511-1522.

18. Kouyos RD, Silander OK, & Bonhoeffer S (2007) Epistasis between deleterious mutations and the evolution of recombination. *Trends Ecol Evol* 22(6):308-315.
19. MacLean RC (2010) Predicting epistasis: an experimental test of metabolic control theory with bacterial transcription and translation. *J Evol Biol* 23(3):488-493.
20. Team RC (2013) R: A language and environment for statistical computing Vienna, Austria).
21. Karimova G, Pidoux J, Ullmann A, & Ladant D (1998) A bacterial two-hybrid system based on a reconstituted signal transduction pathway. *Proc. Natl. Acad. Sci. USA* 95(10):5752-5756.
22. van den Ent F, *et al.* (2006) Dimeric structure of the cell shape protein MreC and its functional implications. *Mol Microbiol* 62(6):1631-1642.
23. Miller JH (1972) *Experiments in molecular genetics* (Cold Spring Harbor Laboratory, Cold Spring Harbor, N. Y.).
24. Borthakur PB, Orozco CC, Young-Robbins SS, Haselkorn R, & Callahan SM (2005) Inactivation of *patS* and *hetN* causes lethal levels of heterocyst differentiation in the filamentous cyanobacterium *Anabaena* sp. PCC 7120. *Mol. Microbiol.* 57:111-123.
25. Videau P, Wells KN, Singh AJ, Gerwick WH, & Philmus B (2016) Assessment of *Anabaena* sp. strain PCC 7120 as a heterologous expression host for cyanobacterial natural products: Production of lyngbyatoxin A. *ACS Synth. Biol.* 5(9):978-988.
26. Pinto F, Pacheco C, Ferreira D, Moradas-Ferreira P, & Tamagnini P (2012) Selection of suitable reference genes for RT-qPCR analyses in cyanobacteria. *PLoS One* 7(4):e34983.

### Legends for Supplemental Figures

**Figure S1.** Vegetative cell interval lengths during *hetP* overexpression. Wild-type cells carrying either an empty  $P_{petE}$  vector (pPJAV213; black bars) or the copper-inducible  $P_{petE}$ -*hetP* (pSMC224; grey bars) were grown in nitrogen-replete conditions and stepped down to media lacking fixed nitrogen supplemented with 2  $\mu$ M copper. After 24 hours, cells were imaged and the number of vegetative cells between heterocysts were counted for 300 intervals in each strain. The height of the bars (y-axis) represents the frequency of intervals with the indicated interval length (x-axis).

**Figure S2.** HetP is widely distributed and conserved. A) Phylogenetic tree generated by Maximum Likelihood method based on the JTT matrix-based model in MEGA6. Physiological characteristics associated with groupings are noted with brackets to the right. B) Amino acid sequences were aligned using the BLOSUM62 exchange weights matrix within the PProfile ALiGnEment (PRALINE) multiple sequence alignment application. Colors indicate degree of similarity from blue (no similarity) to red (identical). C) Sequence alignment of HetP (Alr2818), Asl1930, Alr2902, and Alr3234 of *Anabaena*. Colors indicate degree of conservation from blue (no similarity) to red (identical).

**Figure S3.** Bypass of wild type, *hetP*, *hetR*, and quadruple mutants by HetP and homologs. Average percent heterocysts out of 500 cells after nitrogen stepdown. Each background carries either an empty  $P_{petE}$  vector (pPJAV213),  $P_{petE}$ -*hetP* (pSMC224),  $P_{petE}$ -*asl1930* (pKH282),  $P_{petE}$ -*alr2902* (pKH281), or  $P_{petE}$ -*alr3234* (pSMC226). A)  $\Delta$ *hetP* (UHM158) at 24 hours after stepdown. Strain  $\Delta$ *hetR* (UHM103) 96 hours after nitrogen stepdown. B) Wild type 24 hours after stepdown. C) Quadruple mutant  $\Delta$ *hetP*  $\Delta$ *asl1930*  $\Delta$ *alr2902*  $\Delta$ *alr3234* (UHM333) 24 hours after stepdown. D) Quadruple mutant  $\Delta$ *hetP*  $\Delta$ *asl1930*  $\Delta$ *alr2902*  $\Delta$ *alr3234* (UHM333) 72 hours after stepdown. All media conditions were supplemented with copper to a final concentration of 2  $\mu$ M. Error bars represent the standard deviation of the mean for 3 replicates.

**Figure S4.** Expression of  $P_{pats}$ -*gfp* in various *Anabaena* strains. Brightfield (BF), autofluorescence (AF), and GFP micrographs of wild type,  $\Delta$ *hetP*  $\Delta$ *asl1930*  $\Delta$ *alr2902* (UHM282),  $\Delta$ *hetP*  $\Delta$ *asl1930*  $\Delta$ *alr3234* (UHM283),  $\Delta$ *hetP*  $\Delta$ *alr2902*  $\Delta$ *alr3234* (UHM284), and  $\Delta$ *hetP*  $\Delta$ *asl1930*  $\Delta$ *alr2902*  $\Delta$ *alr3234* (UHM333) carrying  $P_{pats}$ -*gfp* (pAM1951) 10 hours after nitrogen stepdown.

**Figure S5.** Expression of  $P_{alr2902}$ -*gfp* and  $P_{alr3234}$ -*gfp* in various *Anabaena* strains. Plasmids containing transcriptional fusions of the promoter regions of A) *alr2902* (pPJAV331) and B) *alr3234* (pPJAV332) to *gfp* were introduced into wild type (WT),  $\Delta$ *hetR* (UHM103),  $\Delta$ *patA* (UHM101),  $\Delta$ *hetP* (UHM158), and  $\Delta$ *hetP*  $\Delta$ *asl1930*  $\Delta$ *alr2902*  $\Delta$ *alr3234* (UHM333). The resulting strains were grown in nitrogen-replete conditions and imaged (bright field, left columns and GFP, right columns). Strains were then stepped down to media lacking combined nitrogen and imaged after 24 hours (WT,  $\Delta$ *hetR*,  $\Delta$ *patA*) or 48 hours ( $\Delta$ *hetP*,  $\Delta$ *hetP*  $\Delta$ *asl1930*  $\Delta$ *alr2902*  $\Delta$ *alr3234*). C) Relative expression of *hetP*, *alr2902*, and *alr3234* in the wild type measured by RT-qPCR at 6, 12, 18, and 24 hours after nitrogen stepdown. Height of the bars indicates the fold change in expression relative to time 0 for the same gene. Error bars represent the standard deviation. Asterisks indicate a significant difference in expression from time 0 ( $p < 0.05$ ). D) Intensity of GFP signal from each GFP subpanel in part B. Average pixel intensity for cells (black bars) or background (grey bars) for each genotype indicated in either N+ or N- conditions. Error bars represent standard deviation. Each pair of bars is significantly different ( $p < 0.001$ ).

**Figure S6.** Influence of HetR on gene expression. RNA was purified from  $\Delta$ *hetR* (UHM103) and  $\Delta$ *patA* (UHM101) strains at 0 hours and 24 hours after nitrogen



stepdown. RT-qPCR was performed using primer sets for A) *hetP*, B) *asl1930*, C) *alr2902*, and D) *alr3234*. Height of the bars indicates fold change in expression relative to wild type at the indicated time point (all bars  $p < 0.05$ ). Error bars represent the standard deviation.

Figure S1

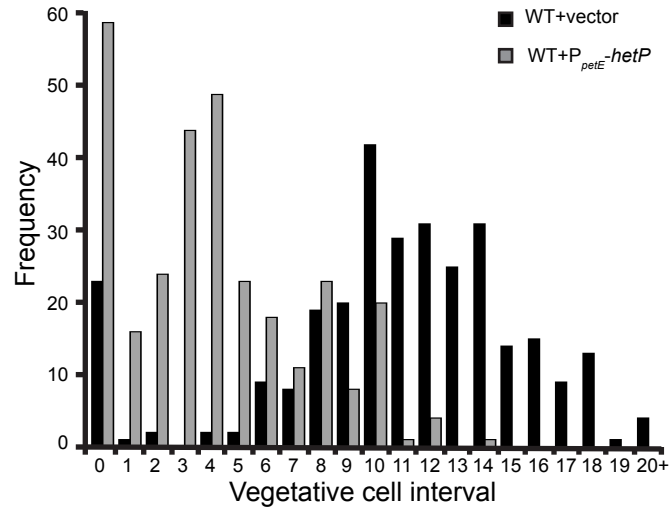

Figure S2

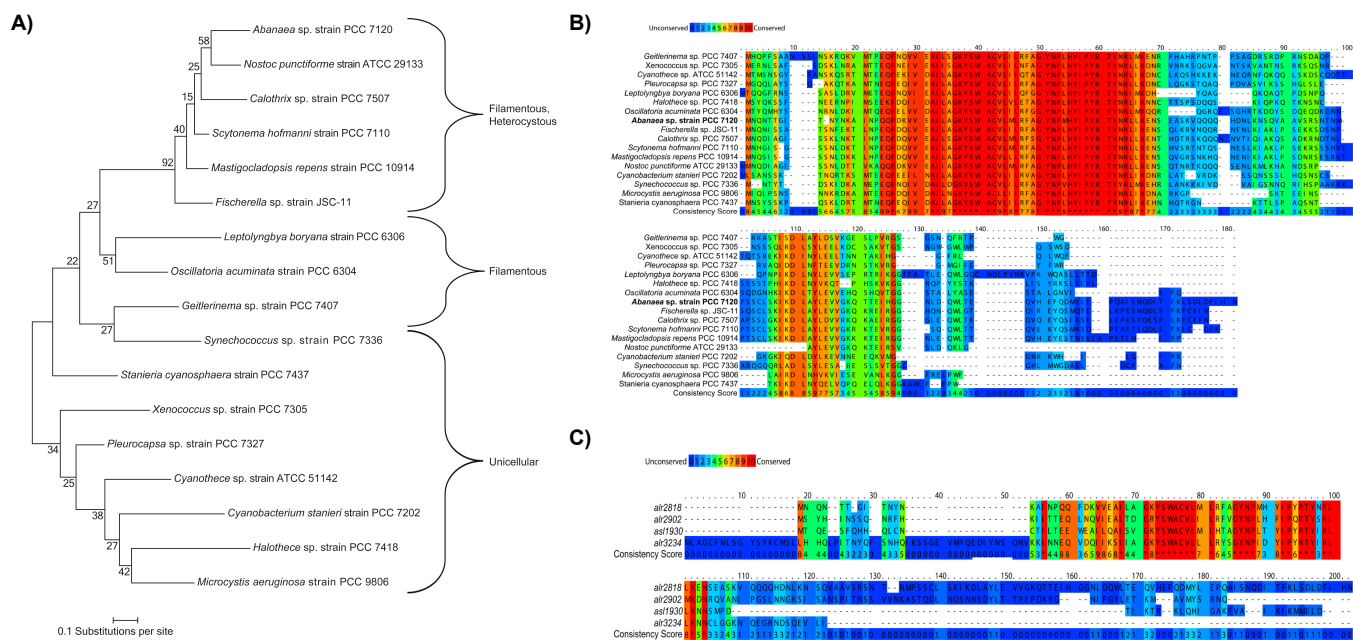

Figure S3

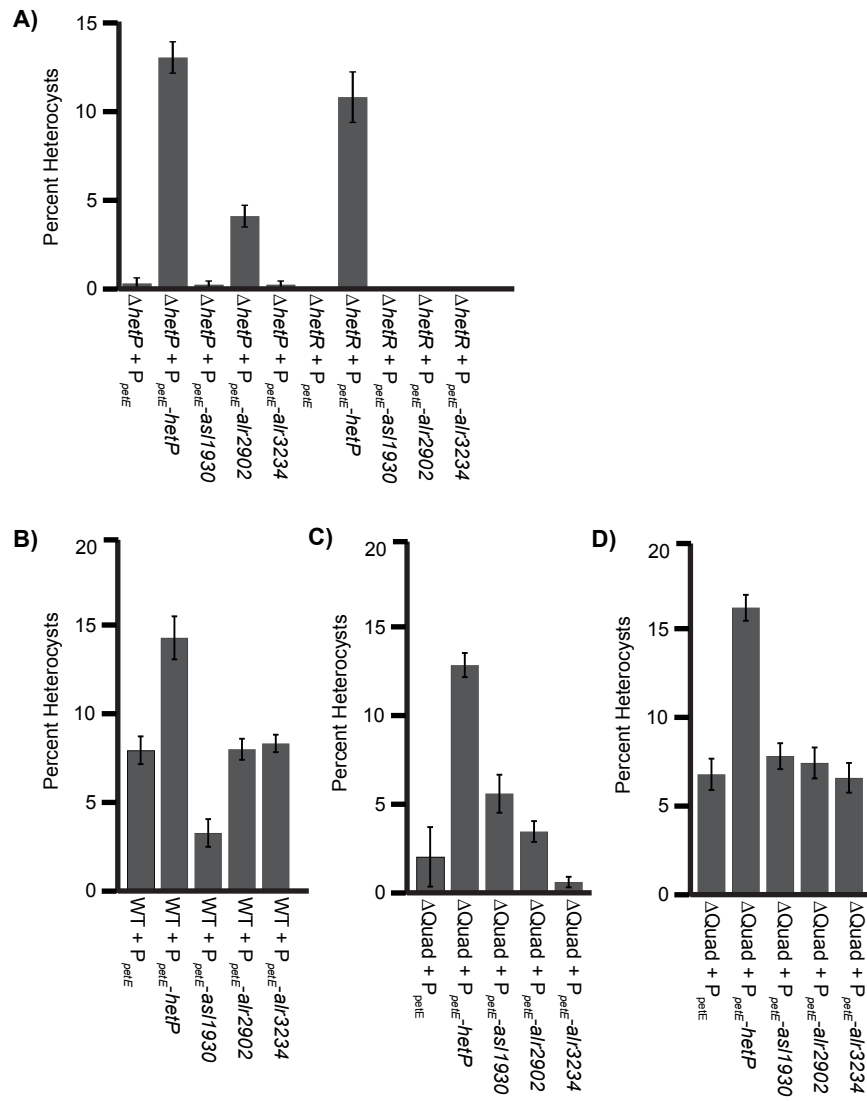

Figure S4

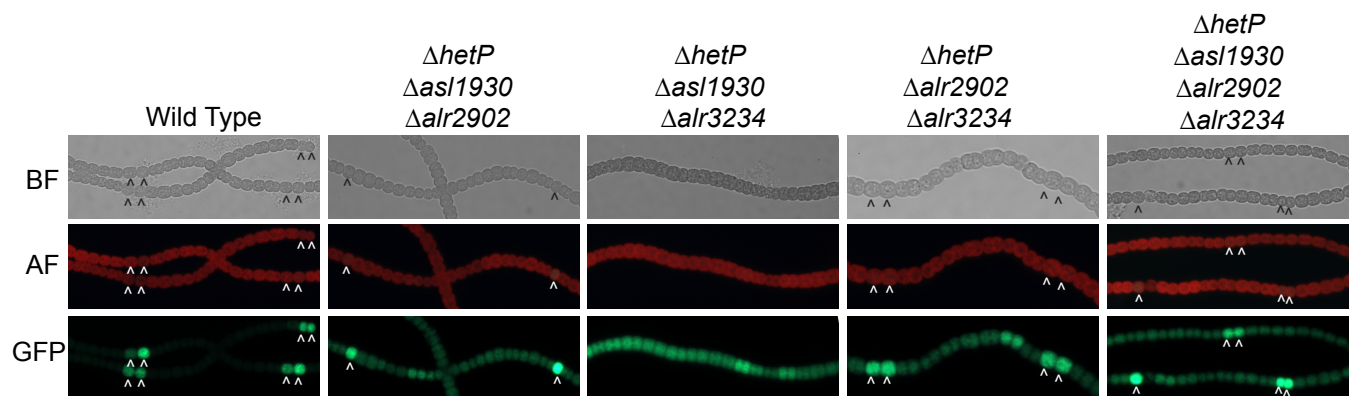

Figure S5

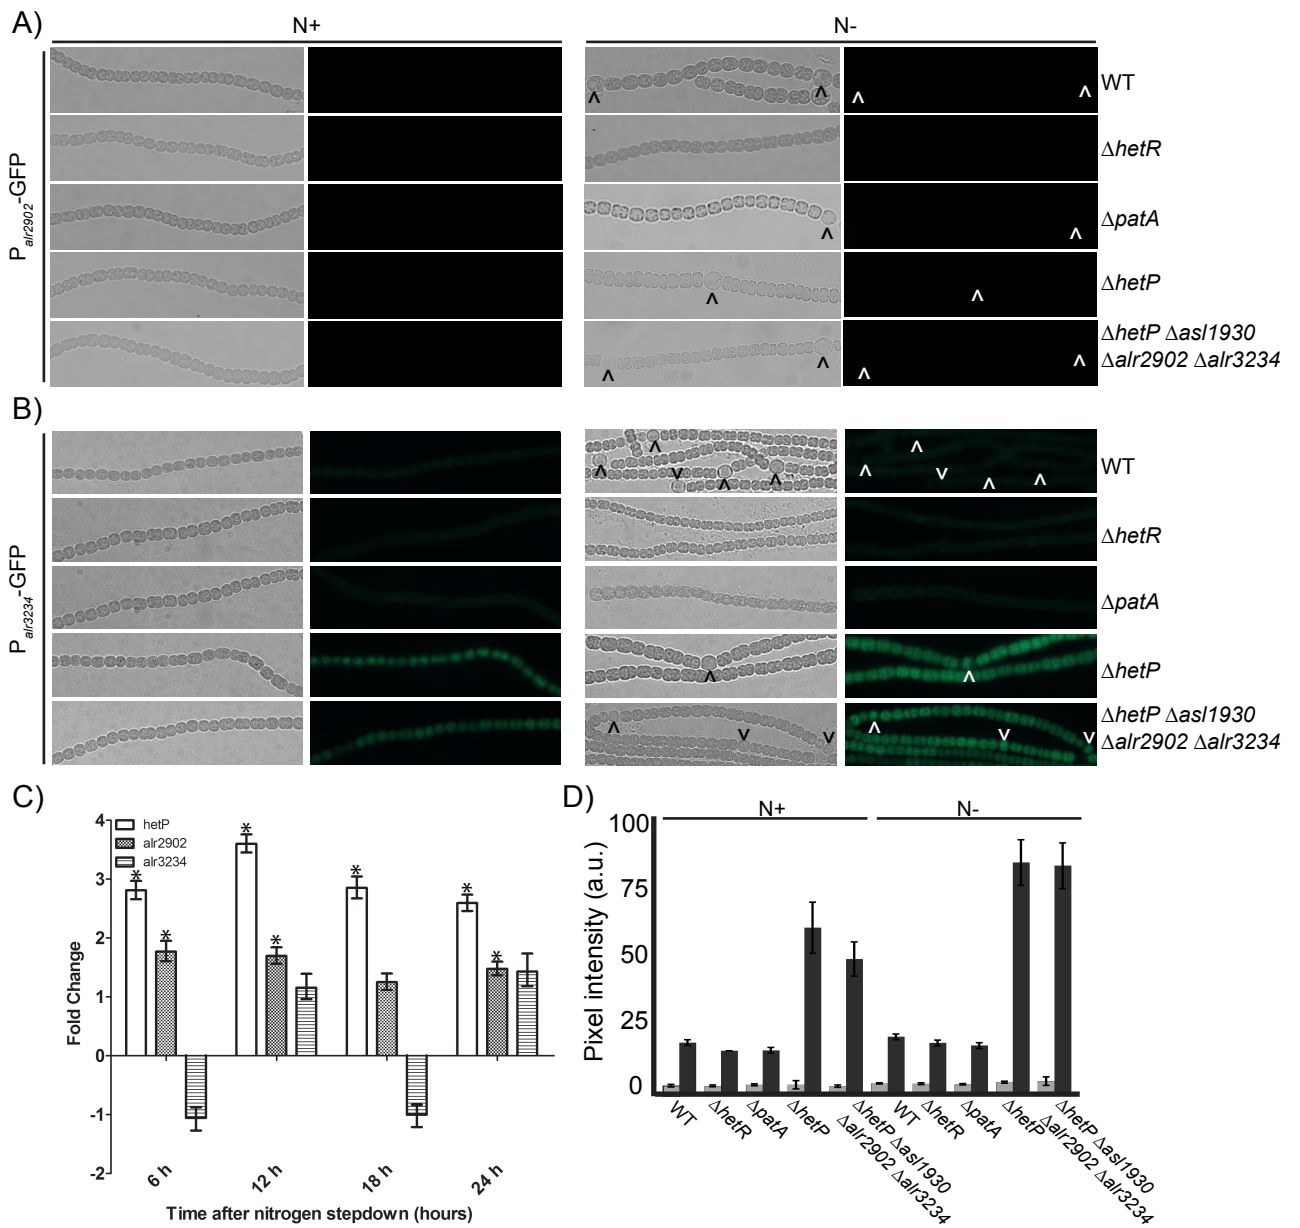

Figure S6

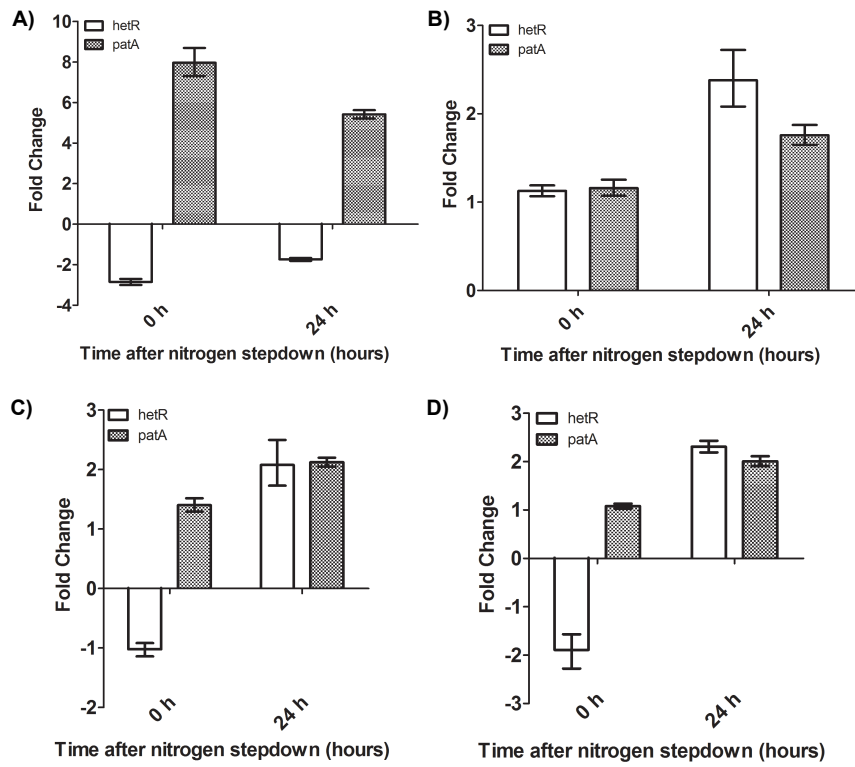

**Table S1.** Patterns of heterocyst production and function by strains of *Anabaena*.

| Strain                                                      | Heterocyst Production (%)                                                                    | Nitrogenase Activity (nmol C <sub>2</sub> H <sub>2</sub> /A <sub>750</sub> *h) | Time of Commitment (h) |
|-------------------------------------------------------------|----------------------------------------------------------------------------------------------|--------------------------------------------------------------------------------|------------------------|
| Wild type                                                   | 24h: 9.1 ± 0.6<br>48h: 7.31± 0.6<br>72h: 9.1 ± 0.4<br>96h: 8.7 ± 1.0<br>120h: 8.9 ± 0.3      | 0.705 ± 0.013                                                                  | 9-13                   |
| <i>ΔhetR</i> (UHM103)                                       | 24h: 0<br>48h: 0<br>72h: 0<br>96h: 0<br>120h: 0                                              | 0                                                                              | N/A                    |
| <i>ΔpatS::Ω Sp<sup>r</sup>/Sm<sup>r</sup></i> (UHM334)      | 24h: 24.9 ± 2.7<br>48h: 20.1 ± 1.1<br>72h: 17.5 ± 1.9<br>96h: 15.7 ± 2.1<br>120h: 16.6 ± 1.3 | 0.323 ± 0.093                                                                  | 7-12                   |
| <i>ΔhetP</i> (UHM158)                                       | 24h: 0.4 ± 0.2<br>48h: 2.7 ± 0.5<br>72h: 3.0 ± 0.5<br>96h: 2.6 ± 0.9<br>120h: 3.1 ± 0.8      | 0.051 ± 0.005                                                                  | 20-36                  |
| <i>ΔhetPΔpatS::Ω Sp<sup>r</sup>/Sm<sup>r</sup></i> (UHM223) | 24h: 17.8 ± 0.7<br>48h: 12.9 ± 1.6<br>72h: 9.3 ± 0.8<br>96h: 9.4 ± 1.7<br>120h: 10.6 ± 1.1   | 0.243 ± 0.048                                                                  | 18-24                  |
| <i>Δasl1930</i> (UHM295)                                    | 24h: 7.1 ± 0.4<br>48h: 7.6 ± 0.6<br>72h: 8.2 ± 0.5<br>96h: 7.7 ± 0.9<br>120h: 7.6 ± 0.7      | 0.222 ± 0.025                                                                  | 4-8                    |
| <i>Δalr2902</i> (UHM296)                                    | 24h: 7.1 ± 0.4<br>48h: 8.4 ± 0.7<br>72h: 8.3 ± 0.8<br>96h: 8.0 ± 0.7<br>120h: 7.9 ± 1.2      | 0.376 ± 0.169                                                                  | 8-12                   |
| <i>Δalr3234</i> (UHM336)                                    | 24h: 7.2 ± 1.2<br>48h: 7.5 ± 1.0<br>72h: 7.2 ± 0.3<br>96h: 7.0 ± 0.7<br>120h: 7.3 ± 1.0      | 0.479 ± 0.178                                                                  | 3-8                    |
| <i>ΔhetPΔasl1930</i> (UHM288)                               | 24h: 1.3 ± 0.6<br>48h: 1.4 ± 0.4                                                             | 0.019 ± 0.003                                                                  | N/D                    |



|                                             |                                                                                                             |                   |      |
|---------------------------------------------|-------------------------------------------------------------------------------------------------------------|-------------------|------|
|                                             | 72h: $2.0 \pm 0.5$<br>96h: $2.0 \pm 0.4$<br>120h: $2.4 \pm 0.5$                                             |                   |      |
| <i>ΔhetPΔalr2902</i> (UHM287)               | 24h: 0<br>48h: $1.4 \pm 0.6$<br>72h: $2.4 \pm 0.5$<br>96h: $2.3 \pm 0.6$<br>120h: $2.2 \pm 0.2$             | $0.415 \pm 0.046$ | N/D  |
| <i>ΔhetPΔalr3234</i> (UHM286)               | 24h: $0.2 \pm 0.2$<br>48h: $1.5 \pm 0.3$<br>72h: $2.0 \pm 0.7$<br>96h: $2.3 \pm 0.6$<br>120h: $2.5 \pm 0.8$ | $0.041 \pm 0.018$ | N/D  |
| <i>Δasl1930Δalr2902</i> (UHM297)            | 24h: $8.5 \pm 0.5$<br>48h: $8.5 \pm 0.6$<br>72h: $8.7 \pm 0.6$<br>96h: $8.4 \pm 0.8$<br>120h: $8.0 \pm 0.6$ | $0.916 \pm 0.160$ | N/D  |
| <i>Δasl1930Δalr3234</i> (UHM341)            | 24h: $8.5 \pm 1.1$<br>48h: $8.5 \pm 0.9$<br>72h: $8.0 \pm 0.9$<br>96h: $7.1 \pm 0.6$<br>120h: $7.5 \pm 0.7$ | $1.215 \pm 0.249$ | N/D  |
| <i>Δalr2902Δalr3234</i> (UHM343)            | 24h: $7.6 \pm 0.5$<br>48h: $9.0 \pm 0.5$<br>72h: $9.3 \pm 0.5$<br>96h: $8.3 \pm 0.6$<br>120h: $8.9 \pm 1.0$ | $0.789 \pm 0.238$ | N/D  |
| <i>ΔhetPΔasl1930Δalr2902</i><br>(UHM282)    | 24h: $1.1 \pm 0.5$<br>48h: $5.9 \pm 0.9$<br>72h: $6.9 \pm 1.2$<br>96h: $7.7 \pm 1.0$<br>120h: $7.3 \pm 0.5$ | $0.363 \pm 0.062$ | N/D  |
| <i>ΔhetPΔasl1930Δalr3234</i><br>(UHM283)    | 24h: 0<br>48h: 0<br>72h: 0<br>96h: 0<br>120h: 0                                                             | 0                 | N/A  |
| <i>ΔhetPΔalr2902Δalr3234</i><br>(UHM284)    | 24h: $1.2 \pm 0.8$<br>48h: $5.7 \pm 0.7$<br>72h: $7.1 \pm 0.8$<br>96h: $7.4 \pm 0.5$<br>120h: $7.4 \pm 0.7$ | $0.250 \pm 0.048$ | N/D  |
| <i>Δasl1930Δalr2902Δalr3234</i><br>(UHM342) | 24h: $9.9 \pm 0.6$<br>48h: $11.5 \pm 0.6$<br>72h: $11.3 \pm 0.9$                                            | 0                 | 8-12 |

|                                                  |                                                                                         |               |       |
|--------------------------------------------------|-----------------------------------------------------------------------------------------|---------------|-------|
|                                                  | 96h: 11.5 ± 1.2<br>120h: 11.3 ± 0.7                                                     |               |       |
| <i>ΔhetPΔasl1930Δalr2902Δalr3234</i><br>(UHM333) | 24h: 2.3 ± 0.5<br>48h: 5.2 ± 0.7<br>72h: 6.9 ± 0.8<br>96h: 7.3 ± 0.5<br>120h: 7.4 ± 0.5 | 0.332 ± 0.158 | 18-24 |

At the indicated times following nitrogen stepdown, 500 cells were counted in triplicate and total heterocysts are presented as the mean ± the standard deviation. Aerobic acetylene reduction assays were conducted in triplicate at 24 or 72 h (UHM158, UHM282, UHM283, UHM284, UHM286, UHM287, UHM288, and UHM233) after the removal of combined nitrogen and are presented as the mean ± the standard deviation. The time of commitment was defined as the duration required to transition from no heterocysts forming after the replacement of a nitrogen source to the maximum heterocyst percentage produced for the strain. N/D; not done. N/A; not applicable because the strain produced no heterocysts.

**Table S2.** Quantitative epistatic interactions govern heterocyst differentiation in strains mutant for *hetP*, *asl1930*, *alr2902*, and/or *alr3234*.

|                                | <b>Interaction between two loci</b>   |                |                |                |
|--------------------------------|---------------------------------------|----------------|----------------|----------------|
|                                | <i>hetP</i>                           | <i>asl1930</i> | <i>alr2902</i> | <i>alr3234</i> |
| <i>hetP</i>                    |                                       | -0.43          | -0.18          | -0.38          |
| <i>asl1930</i>                 |                                       |                | 0.16           | 0.14           |
| <i>alr2902</i>                 |                                       |                |                | 0.10           |
| <i>alr3234</i>                 |                                       |                |                |                |
|                                | <b>Interaction between three loci</b> |                |                |                |
|                                | <i>hetP</i>                           | <i>asl1930</i> | <i>alr2902</i> | <i>alr3234</i> |
| <i>hetP asl1930</i>            |                                       |                | 1.28           | N/A            |
| <i>hetP alr2902</i>            |                                       | 1.02           |                | 1.12           |
| <i>hetP alr3234</i>            |                                       | N/A            | 1.32           |                |
| <i>asl1930 alr2902</i>         | 0.69                                  |                |                | 0.17           |
| <i>asl1930 alr3234</i>         | N/A                                   |                | 0.20           |                |
| <i>alr2902 alr3234</i>         | 0.84                                  | 0.23           |                |                |
|                                | <b>Interaction between four loci</b>  |                |                |                |
|                                | <i>hetP</i>                           | <i>asl1930</i> | <i>alr2902</i> | <i>alr3234</i> |
| <i>hetP asl1930 alr2902</i>    |                                       |                |                | 0.03           |
| <i>hetP asl1930 alr3234</i>    |                                       |                | N/A            |                |
| <i>hetP alr2902 alr3234</i>    |                                       | -0.06          |                |                |
| <i>asl1930 alr2902 alr3234</i> | 0.54                                  |                |                |                |

The fitness of each mutant was defined as the difference in heterocyst percentage between the mutant and wild type counted at the time of maximal production after nitrogen stepdown, either 24 or 72 h. The heterocyst fitness of each mutant was used to calculate the epistatic interaction between loci. Gene combinations resulting in values less than 0 are interpreted as being synergistic, greater than 0 as antagonistic, and equal to zero as simply additive. N/A denotes the impossibility of the calculation because one of the strains did not produce heterocysts.

**Table S3.** Heterocyst production in strains overexpressing *hetP*, *asl1930*, *alr2902*, or *alr3234*.

| Strain                                             | Heterocyst Percentage after Nitrogen Stepdown |             |            |            |            |             |
|----------------------------------------------------|-----------------------------------------------|-------------|------------|------------|------------|-------------|
|                                                    | 0 h                                           | 24 h        | 48 h       | 72 h       | 96 h       | 120 h       |
| Wild type + P <sub>petE</sub>                      | 0.6 ± 0.72                                    | 8.1 ± 0.81  | 7.7 ± 0.81 | 7.7 ± 0.90 | 6.9 ± 0.83 | 7.2 ± 1.3   |
| Wild type + P <sub>petE</sub> - <i>hetP</i>        | 7.4 ± 1.0                                     | 14.6 ± 1.3  | 18.8 ± 1.6 | 21.6 ± 1.8 | 21.9 ± 2.3 | 18.5 ± 0.83 |
| Wild type + P <sub>petE</sub> - <i>asl1930</i>     | 0.3 ± 0.42                                    | 3.3 ± 0.81  | 6.1 ± 0.42 | 7.9 ± 0.99 | 7.4 ± 0.80 | 7.2 ± 0.72  |
| Wild type + P <sub>petE</sub> - <i>alr2902</i>     | 0.2 ± 0.20                                    | 8.1 ± 0.61  | 7.3 ± 1.2  | 7.5 ± 0.81 | 6.9 ± 0.50 | 7.0 ± 0.72  |
| Wild type + P <sub>petE</sub> - <i>alr3234</i>     | 0.4 ± 0.40                                    | 8.5 ± 0.50  | 7.8 ± 0.87 | 7.2 ± 1.1  | 6.9 ± 0.50 | 7.1 ± 0.42  |
| Δ <i>hetR</i> + P <sub>petE</sub>                  | 0                                             | 0           | 0          | 0          | 0          | 0           |
| Δ <i>hetR</i> + P <sub>petE</sub> - <i>hetP</i>    | 0                                             | 0.2 ± 0.20  | 1.0 ± 0.20 | 4.7 ± 1.0  | 10.6 ± 1.4 | 43.9 ± 2.3  |
| Δ <i>hetR</i> + P <sub>petE</sub> - <i>asl1930</i> | 0                                             | 0           | 0          | 0          | 0          | 0           |
| Δ <i>hetR</i> + P <sub>petE</sub> - <i>alr2902</i> | 0                                             | 0           | 0          | 0          | 0          | 0           |
| Δ <i>hetR</i> + P <sub>petE</sub> - <i>alr3234</i> | 0                                             | 0           | 0          | 0          | 0          | 0           |
| Δ <i>hetP</i> + P <sub>petE</sub>                  | 0                                             | 0.3 ± 0.31  | 2.1 ± 0.31 | 2.8 ± 0.80 | 2.9 ± 0.42 | 2.3 ± 0.42  |
| Δ <i>hetP</i> + P <sub>petE</sub> - <i>hetP</i>    | 5.5 ± 0.81                                    | 12.8 ± 0.87 | 15.0 ± 1.3 | 18.8 ± 1.3 | 17.6 ± 1.3 | 17.7 ± 1.4  |
| Δ <i>hetP</i> + P <sub>petE</sub> - <i>asl1930</i> | 0                                             | 0.2 ± 0.20  | 2.3 ± 0.42 | 2.5 ± 0.70 | 3.1 ± 0.61 | 2.6 ± 0.42  |
| Δ <i>hetP</i> + P <sub>petE</sub> - <i>alr2902</i> | 0                                             | 4.0 ± 0.60  | 6.1 ± 0.70 | 6.7 ± 0.95 | 6.9 ± 0.31 | 6.9 ± 0.50  |
| Δ <i>hetP</i> + P <sub>petE</sub> - <i>alr3234</i> | 0                                             | 0.2 ± 0.20  | 2.0 ± 0.53 | 3.1 ± 0.53 | 3.1 ± 0.95 | 3.2 ± 0.20  |
| UHM333 + P <sub>petE</sub>                         | 0                                             | 0.4 ± 0.35  | 4.9 ± 0.95 | 7.0 ± 0.92 | 6.5 ± 0.70 | 6.7 ± 0.42  |
| UHM333 + P <sub>petE</sub> - <i>hetP</i>           | 6.7 ± 1.0                                     | 13.1 ± 2.1  | 13.7 ± 1.1 | 16.7 ± 1.2 | 16.9 ± 1.3 | 17.5 ± 2.0  |
| UHM333 + P <sub>petE</sub> - <i>asl1930</i>        | 0                                             | 5.7 ± 0.70  | 6.7 ± 0.64 | 8.1 ± 0.76 | 7.5 ± 1.2  | 8.6 ± 0.80  |
| UHM333 + P <sub>petE</sub> - <i>alr2902</i>        | 0                                             | 3.5 ± 1.3   | 6.5 ± 0.50 | 7.7 ± 0.90 | 7.7 ± 0.70 | 7.5 ± 0.31  |
| UHM333 + P <sub>petE</sub> - <i>alr3234</i>        | 0                                             | 0.5 ± 0.31  | 4.5 ± 0.99 | 6.8 ± 0.87 | 6.9 ± 0.81 | 7.3 ± 0.31  |

Heterocyst percentage produced by various strains individually complemented with *hetP*, *asl1930*, *alr2902*, or *alr3234* controlled by the *petE* promoter following the removal of combined nitrogen. At the indicated times following nitrogen stepdown, 500 cells were counted

in triplicate and total heterocysts are presented as the mean  $\pm$  the standard deviation. Expression of the *petE* promoter was achieved by the addition of copper to a final concentration of 2  $\mu$ M carried by the negative control plasmid (pPJAV213) or driving expression of *hetP* (pSMC224), *asl1930* (pKH282), *alr2902* (pKH281), or *alr3234* (pSMC226) in the wild type,  $\Delta$ *hetR* (UHM103),  $\Delta$ *hetP* (UHM158), or the quadruple homolog mutant (UHM333).

**Table S4.** BACTH protein interactions for HetR, HetP, Asl1930, Alr2902, and Alr3234.

| <b>Plasmid 1</b>     | <b>Plasmid 2</b>     | <b>Blue Color (Y/N)</b> | <b>Beta-gal Activity (MU±SD)</b> |
|----------------------|----------------------|-------------------------|----------------------------------|
| pT18-C-link          | pT25-C-link          | N                       | 132.4 ± 22.4                     |
| pT18-N-link          | pT25-C-link          | N                       | 154.8±36.5                       |
| pT18-C-link          | pT25-N-link          | N                       | 148.4±15.3                       |
| pT18-N-link          | pT25-N-link          | N                       | 163.7±33.3                       |
| pJP41: pUT18-divIVA  | pJP42: pKNT25-divIVA | Y                       | 6360.3±110.1                     |
| pRO176: T18C-hetP    | pRO178: T25C-hetP    | N                       | ND                               |
| pRO177: T18N-hetP    | pRO178: T25C-hetP    | N                       | ND                               |
| pRO180: T18C-asl1930 | pRO178: T25C-hetP    | N                       | ND                               |
| pRO181: T18N-asl1930 | pRO178: T25C-hetP    | N                       | ND                               |
| pRO184: T18Calr-2902 | pRO178: T25C-hetP    | N                       | ND                               |
| pRO185: T18N-alr2902 | pRO178: T25C-hetP    | N                       | ND                               |
| pRO188: T18C-alr3234 | pRO178: T25C-hetP    | N                       | ND                               |
| pRO189: T18N-alr3234 | pRO178: T25C-hetP    | N                       | ND                               |
| pST565: T18C-hetR    | pRO178: T25C-hetP    | N                       | ND                               |
| pST579: T18N-hetR    | pRO178: T25C-hetP    | N                       | ND                               |
| pRO176: T18C-hetP    | pRO170: T25N-hetP    | N                       | ND                               |
| pRO177: T18N-hetP    | pRO170: T25N-hetP    | N                       | ND                               |
| pRO180: T18C-asl1930 | pRO170: T25N-hetP    | N                       | ND                               |
| pRO181: T18N-asl1930 | pRO170: T25N-hetP    | Y                       | 399.0±110.7                      |
| pRO184: T18Calr-2902 | pRO170: T25N-hetP    | N                       | ND                               |
| pRO185: T18N-alr2902 | pRO170: T25N-hetP    | N                       | ND                               |
| pRO188: T18C-alr3234 | pRO170: T25N-hetP    | N                       | ND                               |
| pRO189: T18N-alr3234 | pRO170: T25N-hetP    | Y                       | 472.3±91.4                       |
| pST565: T18C-hetR    | pRO170: T25N-hetP    | N                       | ND                               |
| pST579: T18N-hetR    | pRO170: T25N-hetP    | N                       | ND                               |
| pRO176: T18C-hetP    | pRO182: T25C-asl1930 | N                       | ND                               |
| pRO177: T18N-hetP    | pRO182: T25C-asl1930 | N                       | ND                               |
| pRO180: T18C-asl1930 | pRO182: T25C-asl1930 | N                       | ND                               |
| pRO181: T18N-asl1930 | pRO182: T25C-asl1930 | N                       | ND                               |
| pRO184: T18Calr-2902 | pRO182: T25C-asl1930 | N                       | ND                               |

|                               |                              |   |             |
|-------------------------------|------------------------------|---|-------------|
| pRO185: T18N- <i>alr2902</i>  | pRO182: T25C- <i>asl1930</i> | N | ND          |
| pRO188: T18C- <i>alr3234</i>  | pRO182: T25C- <i>asl1930</i> | N | ND          |
| pRO189: T18N- <i>alr3234</i>  | pRO182: T25C- <i>asl1930</i> | Y | 531.9±130.5 |
| pST565: T18C- <i>hetR</i>     | pRO182: T25C- <i>asl1930</i> | N | ND          |
| pST579: T18N- <i>hetR</i>     | pRO182: T25C- <i>asl1930</i> | N | ND          |
| pRO176: T18C- <i>hetP</i>     | pRO183: T25C- <i>asl1930</i> | N | ND          |
| pRO177: T18N- <i>hetP</i>     | pRO183: T25C- <i>asl1930</i> | N | ND          |
| pRO180: T18C- <i>asl1930</i>  | pRO183: T25C- <i>asl1930</i> | Y | 262.3±28.6  |
| pRO181: T18N- <i>asl1930</i>  | pRO183: T25C- <i>asl1930</i> | N | ND          |
| pRO184: T18C- <i>alr-2902</i> | pRO183: T25C- <i>asl1930</i> | N | ND          |
| pRO185: T18N- <i>alr2902</i>  | pRO183: T25C- <i>asl1930</i> | Y | 513.5±14.5  |
| pRO188: T18C- <i>alr3234</i>  | pRO183: T25C- <i>asl1930</i> | N | ND          |
| pRO189: T18N- <i>alr3234</i>  | pRO183: T25C- <i>asl1930</i> | N | ND          |
| pST565: T18C- <i>hetR</i>     | pRO183: T25C- <i>asl1930</i> | Y | 376.2±63.5  |
| pST579: T18N- <i>hetR</i>     | pRO183: T25C- <i>asl1930</i> | N | ND          |
| pRO176: T18C- <i>hetP</i>     | pRO186: T25C- <i>alr2902</i> | N | ND          |
| pRO177: T18N- <i>hetP</i>     | pRO186: T25C- <i>alr2902</i> | N | ND          |
| pRO180: T18C- <i>asl1930</i>  | pRO186: T25C- <i>alr2902</i> | N | ND          |
| pRO181: T18N- <i>asl1930</i>  | pRO186: T25C- <i>alr2902</i> | N | ND          |
| pRO184: T18C- <i>alr-2902</i> | pRO186: T25C- <i>alr2902</i> | N | ND          |
| pRO185: T18N- <i>alr2902</i>  | pRO186: T25C- <i>alr2902</i> | N | ND          |
| pRO188: T18C- <i>alr3234</i>  | pRO186: T25C- <i>alr2902</i> | N | ND          |
| pRO189: T18N- <i>alr3234</i>  | pRO186: T25C- <i>alr2902</i> | Y | 287.3±65.1  |
| pST565: T18C- <i>hetR</i>     | pRO186: T25C- <i>alr2902</i> | N | ND          |
| pST579: T18N- <i>hetR</i>     | pRO186: T25C- <i>alr2902</i> | N | ND          |
| pRO176: T18C- <i>hetP</i>     | pRO187: T25N- <i>alr2902</i> | N | ND          |
| pRO177: T18N- <i>hetP</i>     | pRO187: T25N- <i>alr2902</i> | Y | 305.6±79.3  |
| pRO180: T18C- <i>asl1930</i>  | pRO187: T25N- <i>alr2902</i> | N | ND          |
| pRO181: T18N- <i>asl1930</i>  | pRO187: T25N- <i>alr2902</i> | Y | 275.2±60.2  |
| pRO184: T18C- <i>alr-2902</i> | pRO187: T25N- <i>alr2902</i> | Y | 489.6±75.9  |
| pRO185: T18N- <i>alr2902</i>  | pRO187: T25N- <i>alr2902</i> | N | ND          |
| pRO188: T18C- <i>alr3234</i>  | pRO187: T25N- <i>alr2902</i> | N | ND          |
| pRO189: T18N- <i>alr3234</i>  | pRO187: T25N- <i>alr2902</i> | N | ND          |

|                      |                      |   |               |
|----------------------|----------------------|---|---------------|
| pST565: T18C-hetR    | pRO187: T25N-als2902 | Y | 4899.3±1263.9 |
| pST579: T18N-hetR    | pRO187: T25N-als2902 | N | ND            |
| pRO176: T18C-hetP    | pRO190: T25C-als3234 | N | ND            |
| pRO177: T18N-hetP    | pRO190: T25C-als3234 | N | ND            |
| pRO180: T18C-als1930 | pRO190: T25C-als3234 | N | ND            |
| pRO181: T18N-als1930 | pRO190: T25C-als3234 | N | ND            |
| pRO184: T18C-als2902 | pRO190: T25C-als3234 | N | ND            |
| pRO185: T18N-als2902 | pRO190: T25C-als3234 | Y | 4676.8±361.8  |
| pRO188: T18C-als3234 | pRO190: T25C-als3234 | N | ND            |
| pRO189: T18N-als3234 | pRO190: T25C-als3234 | N | ND            |
| pST565: T18C-hetR    | pRO190: T25C-als3234 | N | ND            |
| pST579: T18N-hetR    | pRO190: T25C-als3234 | N | ND            |
| pRO176: T18C-hetP    | pRO191: T25N-als3234 | N | ND            |
| pRO177: T18N-hetP    | pRO191: T25N-als3234 | N | ND            |
| pRO180: T18C-als1930 | pRO191: T25N-als3234 | Y | 3209.5±506.9  |
| pRO181: T18N-als1930 | pRO191: T25N-als3234 | N | ND            |
| pRO184: T18C-als2902 | pRO191: T25N-als3234 | Y | 320.1±15.3    |
| pRO185: T18N-als2902 | pRO191: T25N-als3234 | N | ND            |
| pRO188: T18C-als3234 | pRO191: T25N-als3234 | N | ND            |
| pRO189: T18N-als3234 | pRO191: T25N-als3234 | Y | 6034.1±414.0  |
| pST565: T18C-hetR    | pRO191: T25N-als3234 | N | ND            |
| pST579: T18N-hetR    | pRO191: T25N-als3234 | N | ND            |
| pRO176: T18C-hetP    | pST558: T25C-hetR    | N | ND            |
| pRO177: T18N-hetP    | pST558: T25C-hetR    | N | ND            |
| pRO180: T18C-als1930 | pST558: T25C-hetR    | N | ND            |
| pRO181: T18N-als1930 | pST558: T25C-hetR    | N | ND            |
| pRO184: T18C-als2902 | pST558: T25C-hetR    | N | ND            |
| pRO185: T18N-als2902 | pST558: T25C-hetR    | N | ND            |
| pRO188: T18C-als3234 | pST558: T25C-hetR    | N | ND            |
| pRO189: T18N-als3234 | pST558: T25C-hetR    | Y | 5715.0±639.9  |
| pST565: T18C-hetR    | pST558: T25C-hetR    | Y | 8823.4±2490.2 |
| pST579: T18N-hetR    | pST558: T25C-hetR    | Y | 9114.8±1821.9 |
| pRO176: T18C-hetP    | pST572: T25N-hetR    | N | ND            |



|                       |                   |   |               |
|-----------------------|-------------------|---|---------------|
| pRO177: T18N-hetP     | pST572: T25N-hetR | N | ND            |
| pRO180: T18C-asl1930  | pST572: T25N-hetR | N | ND            |
| pRO181: T18N-asl1930  | pST572: T25N-hetR | N | ND            |
| pRO184: T18C-als-2902 | pST572: T25N-hetR | N | ND            |
| pRO185: T18N-als2902  | pST572: T25N-hetR | N | ND            |
| pRO188: T18C-als3234  | pST572: T25N-hetR | N | ND            |
| pRO189: T18N-als3234  | pST572: T25N-hetR | Y | 324.5±15.4    |
| pST565: T18C-hetR     | pST572: T25N-hetR | Y | 4689.4±1001.7 |
| pST579: T18N-hetR     | pST572: T25N-hetR | Y | 2818.2±942.1  |

Blue color: A blue color was detected when grown on solid media supplemented with X-gal  
Beta-gal activity: Average miller units (MU) and standard deviation (SD) of three replicates  
ND: Not determined

**Table S5.** Strains and plasmids used in this study.

| Strain         | Relevant characteristics*                                                                                                  | Source                                   |
|----------------|----------------------------------------------------------------------------------------------------------------------------|------------------------------------------|
| PCC 7120       | Wild type                                                                                                                  | Pasteur Culture Collection               |
| UHM103         | $\Delta hetR$                                                                                                              | (1)                                      |
| UHM158         | $\Delta hetP$                                                                                                              | (2)                                      |
| UHM101         | $\Delta patA$                                                                                                              | (3)                                      |
| UHM334         | $\Delta patS::\Omega Sp^r/Sm^r$                                                                                            | (4)                                      |
| UHM288         | $\Delta hetP \Delta asl1930$                                                                                               | This study                               |
| UHM287         | $\Delta hetP \Delta alr2902$                                                                                               | This study                               |
| UHM286         | $\Delta hetP \Delta alr3234$                                                                                               | This study                               |
| UHM223         | $\Delta hetP \Delta patS::\Omega Sp^r/Sm^r$                                                                                | This study                               |
| UHM282         | $\Delta hetP \Delta asl1930 \Delta alr2902$                                                                                | This study                               |
| UHM283         | $\Delta hetP \Delta asl1930 \Delta alr3234$                                                                                | This study                               |
| UHM284         | $\Delta hetP \Delta alr2902 \Delta alr3234$                                                                                | This study                               |
| UHM333         | $\Delta hetP \Delta asl1930 \Delta alr2902 \Delta alr3234$                                                                 | This study                               |
| UHM295         | $\Delta asl1930$                                                                                                           | This study                               |
| UHM340         | $\Delta alr2902$                                                                                                           | This study                               |
| UHM336         | $\Delta alr3234$                                                                                                           | This study                               |
| UHM297         | $\Delta asl1930 \Delta alr2902$                                                                                            | This study                               |
| UHM341         | $\Delta asl1930 \Delta alr3234$                                                                                            | This study                               |
| UHM343         | $\Delta alr2902 \Delta alr3234$                                                                                            | This study                               |
| UHM342         | $\Delta asl1930 \Delta alr2902 \Delta alr3234$                                                                             | This study                               |
| <b>Plasmid</b> |                                                                                                                            |                                          |
| pAM504         | Shuttle vector for replication in <i>E. coli</i> and <i>Anabaena</i> ; Km <sup>r</sup> Nm <sup>r</sup>                     | (5)                                      |
| pAM1951        | pAM504 carrying P <sub>patS</sub> -gfp                                                                                     | (6)                                      |
| pAM1956        | Shuttle vector pAM504 with promoterless <i>gfp</i>                                                                         | (6)                                      |
| pRL277         | Suicide vector; Sp <sup>r</sup> /Sm <sup>r</sup>                                                                           | (7)                                      |
| pSMC164        | Suicide plasmid used to replace <i>patS</i> with Sp <sup>r</sup> /Sm <sup>r</sup> $\Omega$ interposon                      | (8)                                      |
| pSMC224        | Shuttle vector carrying P <sub>petE</sub> - <i>hetP</i>                                                                    | (2)                                      |
| pKH282         | Shuttle vector carrying P <sub>petE</sub> - <i>asl1930</i>                                                                 | (2)                                      |
| pKH281         | Shuttle vector carrying P <sub>petE</sub> - <i>alr2902</i>                                                                 | (2)                                      |
| pSMC226        | Shuttle vector carrying P <sub>petE</sub> - <i>alr3234</i>                                                                 | (2)                                      |
| pPJA V213      | pAM504 carrying P <sub>petE</sub>                                                                                          | (9)                                      |
| pT18-N-link    | Vector harboring the T18 domain of adenylate cyclase with a flexible linker region for N-terminal fusions; Ap <sup>r</sup> | Gift from Dan Kearns, Indiana University |
| pT18-C-link    | Vector harboring the T18 domain of adenylate cyclase with a flexible linker region for C-terminal fusions; Ap <sup>r</sup> | Gift from Dan Kearns, Indiana University |
| pT25-N-link    | Vector harboring the T25 domain of adenylate cyclase with a flexible linker region for N-terminal fusions; Km <sup>r</sup> | Gift from Dan Kearns, Indiana University |
| pT25-C-link    | Vector harboring the T25 domain of adenylate cyclase with a flexible linker region for C-terminal fusions; Km <sup>r</sup> | Gift from Dan Kearns, Indiana University |

|          |                                                              |            |
|----------|--------------------------------------------------------------|------------|
| pJP41    | pUT18 carrying <i>divIVA</i> from <i>Bacillus subtilis</i>   | (10)       |
| pJP42    | pKNT25 carrying <i>divIVA</i> from <i>Bacillus subtilis</i>  | (10)       |
| pST558   | pKT25 carrying <i>hetR</i>                                   | (11)       |
| pST565   | pUT18C carrying <i>hetR</i>                                  | (11)       |
| pST572   | pKNT25 carrying <i>hetR</i>                                  | (11)       |
| pST579   | pUT18 carrying <i>hetR</i>                                   | (11)       |
| pKH239   | pRL277 used to delete <i>alr2902</i>                         | This study |
| pKH241   | pRL277 used to delete <i>alr3234</i>                         | This study |
| pKH274   | pRL277 used to delete <i>asl1930</i>                         | This study |
| pPJAV298 | pAM504 carrying P <sub>hetP</sub> - <i>hetP</i> (25aa)       | This study |
| pPJAV299 | pAM504 carrying P <sub>hetP</sub> - <i>hetP</i> (50aa)       | This study |
| pPJAV300 | pAM504 carrying P <sub>hetP</sub> - <i>hetP</i> (68aa)       | This study |
| pPJAV301 | pAM504 carrying P <sub>hetP</sub> - <i>hetP</i> (75aa)       | This study |
| pPJAV302 | pAM504 carrying P <sub>hetP</sub> - <i>hetP</i> (100aa)      | This study |
| pPJAV303 | pAM504 carrying P <sub>hetP</sub> - <i>hetP</i> (125aa)      | This study |
| pPJAV304 | pAM504 carrying P <sub>hetP</sub> - <i>hetP</i>              | This study |
| pPJAV305 | pAM504 carrying P <sub>hetP</sub> - <i>hetP</i> (C36A)       | This study |
| pPJAV306 | pAM504 carrying P <sub>hetP</sub> - <i>hetP</i> (C95A)       | This study |
| pPJAV307 | pAM504 carrying P <sub>hetP</sub> - <i>hetP</i> (C36A, C95A) | This study |
| pPJAV327 | pRL277 to reintroduce <i>hetP</i> at the native locus        | This study |
| pPJAV330 | pAM504 carrying P <sub>asl1930</sub> - <i>gfp</i>            | This study |
| pPJAV331 | pAM504 carrying P <sub>alr2902</sub> - <i>gfp</i>            | This study |
| pPJAV332 | pAM504 carrying P <sub>alr3234</sub> - <i>gfp</i>            | This study |
| pPJAV353 | pAM504 carrying P <sub>hetP</sub> - <i>asl1930</i> (68aa)    | This study |
| pPJAV354 | pAM504 carrying P <sub>hetP</sub> - <i>alr2902</i> (68aa)    | This study |
| pPJAV358 | pAM504 carrying P <sub>hetP</sub> - <i>alr3234</i> (68aa)    | This study |
| pRO176   | pT18-C-link carrying C-terminal <i>hetP</i> T18 fusion       | This study |
| pRO177   | pT18-N-link carrying N-terminal <i>hetP</i> T18 fusion       | This study |
| pRO178   | pT25-C-link carrying C-terminal <i>hetP</i> T25 fusion       | This study |
| pRO179   | pT25-N-link carrying N-terminal <i>hetP</i> T25 fusion       | This study |
| pRO180   | pT18-C-link carrying C-terminal <i>asl1930</i> T18 fusion    | This study |
| pRO181   | pT18-N-link carrying N-terminal <i>asl1930</i> T18 fusion    | This study |
| pRO182   | pT25-C-link carrying C-terminal <i>asl1930</i> T25 fusion    | This study |
| pRO183   | pT25-N-link carrying N-terminal <i>asl1930</i> T25 fusion    | This study |
| pRO184   | pT18-C-link carrying C-terminal <i>alr2902</i> T18 fusion    | This study |
| pRO185   | pT18-N-link carrying N-terminal <i>alr2902</i> T18 fusion    | This study |
| pRO186   | pT25-C-link carrying C-terminal <i>alr2902</i> T25 fusion    | This study |
| pRO187   | pT25-N-link carrying N-terminal <i>alr2902</i> T25 fusion    | This study |
| pRO188   | pT18-C-link carrying C-terminal <i>alr3234</i> T18 fusion    | This study |
| pRO189   | pT18-N-link carrying N-terminal <i>alr3234</i> T18 fusion    | This study |
| pRO190   | pT25-C-link carrying C-terminal <i>alr3234</i> T25 fusion    | This study |
| pRO191   | pT25-N-link carrying N-terminal <i>alr3234</i> T25 fusion    | This study |

\*Ap, ampicillin, Km, kanamycin; Nm, neomycin; Sp, spectinomycin; Sm, streptomycin

**Table S6.** Oligonucleotide primers used in this study.

| Oligonucleotide*      | Sequence                                             |
|-----------------------|------------------------------------------------------|
| 1930-up-F             | ATATAAGATCTATCGGGATGGTTTAACTCTC                      |
| 1930-up-R             | TTCCATCATCCCGGGAAAGATTCTTGAGTCATCAGC                 |
| 1930-dn-F             | CAAGAATCTTTCCCGGGATGATGGAATTAGATTAAG                 |
| 1930-dn-R             | ATATAGAGCTCAAGAACTACAACAATCTGC                       |
| d2902-up-F            | ATATAAGATCTAGTGATTCTTCATCTCCCTC                      |
| d2902-up-R            | TTTCCGATACCCGGGTAGCTCATAGTGTC TTGGAG                 |
| d2902-dn-F            | CTATGAGCTACCCGGGTATCGGAAAAGCTAGGTTC                  |
| d2902-dn-R            | ATATAGAGCTCATAACTGTCTTAGAGATAGC                      |
| d3234-up-F            | ATATAAGATCTAACTCAAGGAAACGATAGTC                      |
| d3234-up-R            | TCAAATCAAGCCCGGGCATCCAGCTAACATCAAACC                 |
| d3234-dn-F            | TAGCTGGATGCCCGGGCTTGATTTGAACCACATCTG                 |
| d3234-dn-R            | ATATAGAGCTCTTTCGATTAAGCGAACATCG                      |
| hetP-up-XhoI          | ATATACTCGAGTTGTCTAGTCAGTTGTCAGTCGTCAATAG             |
| hetP-25aa-EcoRV-R     | GAAGTCACATCAGATATCTCATTCAACCACTTTGTCAAATTGTTGAGGATTG |
| hetP-50aa-EcoRV-R     | GAAGTCACATCAGATATCTCAGTAGTGCATAGGATTGTACCCAGCAAAGCG  |
| hetP-68aa-EcoRV-R     | GAAGTCACATCAGATATCTCATTGCTAGCTTCGGAGTTTTCTTTGAG      |
| hetP-75aa-EcoRV-R     | GAAGTCACATCAGATATCTCAATCGTGTTGTTGTTGCTGTACTTTGC      |
| hetP-100aa-EcoRV-R    | GAAGTCACATCAGATATCTCAGATTTTACTTAAGCAACTGGACGGC       |
| hetP-125aa-EcoRV-R    | GAAGTCACATCAGATATCTCATAACCATTGATCTAAATTACCACCATG     |
| hetP-159aa-EcoRV-R    | GAAGTCACATCAGATATCTCAATTATGAATAAAATCTAGGTCTGACAGTTTG |
| hetPC36A-F M475L      | AAATACTCTTGGGCTGCTGTTCTCATGCTGCG                     |
| hetPC36A-R M475L      | CGCAGCATGAGAACAGCAGCCCAAGAGTCTTT                     |
| hetPC95A-F M475L      | AATATGCCGTCCAGTGCCTTAAGTAAAATCAA                     |
| hetPC95A-R M475L      | TTGATTTTACTTAAGGCACTGGACGGCATATT                     |
| PasI1930-XhoI-F M475L | ATATACTCGAGTCTATTACAATGGCTCGTTGAAAAGTGTTCTGGC        |
| PasI1930-R M475L      | CAGCCTAAATTATAAACGTGAATTTAAATGTTGAG                  |
| Palr2902-XhoI-F M475L | ATATACTCGAGTAGGTAAC TGTTTTGCGATAAATTTTTGTCTGTG       |
| Palr2902-R M475L      | AGTGTCTTGGAGATATTTATCTAAATATGAAATTTATAGACTG          |

|                           |                                                    |
|---------------------------|----------------------------------------------------|
| Palr3234-XhoI-F<br>M475L  | ATATACTCGAGTCATACTTGGGCAGTTACAGTCACAGGCG           |
| Palr3234-R<br>M475L       | CAAACCCTGATAAAACAAGACTTTCAAATCTGTCAACAGTC          |
| PhetP-R                   | GGTTGTTATTGTTTTGGATGAAAATATCTCAGC                  |
| asl1930-68aa-F            | TCCAAAACAATAACAACCATGACTCAAGAATCTTCCAGCATCATCAAC   |
| asl1930-68aa-R            | TCATGTATCTGGCATACTATTATTTTTGAGTAGGCG               |
| alr2902-68aa-F            | TCCAAAACAATAACAACCATGAGCTACCACATAAATTCTTCCAAAATCGG |
| alr2902-68aa-R            | TCAATTGGCAACTTGTCTATTGTCTTC                        |
| alr3234-68aa-F            | TCCAAAACAATAACAACCATGTATCAGGAAGACATTTACAATTCACAG   |
| alr3234-68aa-R            | TCATTTCCACCCAGACAGTTGTTTTTGAG                      |
| del-hetP-up-F             | TATATAGATCTGAATAGAGTATGGAGAAGC                     |
| del-hetP-dn-R             | TATATGAGCTCAAGCGAATTGCGTTTTGCG                     |
| del-hetP-up-out           | ATAACGGGTGACATTCATG                                |
| del-hetP-dn-out           | TGTCTTCCAAAGTTCAGATGC                              |
| 1930-up-out               | GAAGAATCAGATGGGACTTGGGC                            |
| 1930-dn-out               | CCCAGAAAATCATTGCTGATACTGCT                         |
| 2902-up-out               | ATCTGTCTTTGCTACGCAAC                               |
| 2902-dn-out               | TCCAATAACTTACCCACGAC                               |
| 3234-up-out               | ACAATTACTAAAGCGACTGC                               |
| 3234-dn-out               | ATAAGTTTTGGGTGGTACTG                               |
| patSfor                   | GATATCTAATCGATGCCACATCTAAG                         |
| patSrev                   | CACATTAATCTCACTAAC TTCTACATC                       |
| Bac2-N-asl1930<br>XbaI F  | AGGAGTCTAGAGACTCAAGAATCTTCCAGCATCATC               |
| Bac2-N-asl1930<br>KpnI R  | CTCCTGGTACCCGATCTAATTCCATCATCTTTATTTTAATAG         |
| Bac2-C-asl1930<br>XbaI F  | AGGAGTCTAGAACTCAAGAATCTTCCAGCATCATC                |
| Bac2-C-asl1930<br>KpnI R  | CTCCTGGTACCATCTAATTCCATCATCTTTATTTTAATAG           |
| Bac2-N-alr2902<br>XbaI F  | AGGAGTCTAGAGAGCTACCACATAAATTCTTCCAAAA              |
| Bac2-N- alr2902<br>KpnI R | CTCCTGGTACCCGTTGATTCCGGCTATACATTACTGCC             |
| Bac2-C- alr2902<br>XbaI F | AGGAGTCTAGAAGCTACCACATAAATTCTTCCAAAA               |
| Bac2-C- alr2902<br>KpnI R | CTCCTGGTACCTTGATTCCGGCTATACATTACTGCC               |
| Bac2-N-alr3234<br>XbaI F  | AGGAGTCTAGAGTTAGCTGGATGTTTTAATCTATCTGG             |
| Bac2-N- alr3234<br>KpnI R | CTCCTGGTACCCGAATCAAGACC TCTTGAGAGTCATTTC           |
| Bac2-C- alr3234<br>XbaI F | AGGAGTCTAGATTAGCTGGATGTTTTAATCTATCTGG              |

|                           |                                                                          |
|---------------------------|--------------------------------------------------------------------------|
| Bac2-C- alr3234<br>KpnI R | CTCCTGGTACCAATCAAGACCTCTTGAGAGTCATTTTC                                   |
| Bac2-N-hetP XbaI<br>F     | AGGAGTCTAGAGAACCAAAACACTACAGGCATAACCA                                    |
| Bac2-N- hetP<br>KpnI R    | CTCCTGGTACCCGATTATGAATAAAAATCTAGGTCTGACAG                                |
| Bac2-C- hetP<br>XbaI F    | AGGAGTCTAGAAACCAAAACACTACAGGCATAACCA                                     |
| Bac2-C- hetP<br>KpnI R    | CTCCTGGTACCATTATGAATAAAAATCTAGGTCTGACAG                                  |
| T25N-NheI F               | AGGAGGCTAGCGCCCAATACGCAAACCGCCTCTCCCC                                    |
| T25N-link-EcoRI<br>R      | CTCCTGAATTCGAGCCAGAACCAGCAGCGGAGCCAGCGGAACCGCTCGGTACC<br>CGGGGATCCTCTAGA |
| T25C-HindIII F            | AGGAGAAGCTTTAATGCGGTTAGTTTATCACAGTT                                      |
| T25C-link-PstI R          | CTCCTCTGCAGCCAGAACCAGCAGCGGAGCCAGCGGAACCCGCCCCGCCGCGTG<br>CGCGCCAG       |
| T18N-link-EcoRI<br>F      | AGGAGGAATTCGGGTTCCGCTGGCTCCGCTGCTGGTTCTGGCGGAGCCGCCAG<br>CGAGGCCACGGGC   |
| T18N-EagI R               | CTCCTCGGCCGCCGCAATCCGGGTGACGCCGGCAC                                      |
| T18C-HindIII F            | AGGAGAAGCTTAGCCGCCAGCGAGGCCACG                                           |
| T18C-link-PstI R          | CTCCTCTGCAGGCCAGAACCAGCAGCGGAGCCAGCGGAACCGTGGCGTTCCAC<br>TGCGCCAGCGACGG  |
| NrnpAF                    | TACGCTCATTGGTGTC TCG                                                     |
| NrnpAR                    | AACAAGTCTCTAATTCTTGC                                                     |
| asl1930-qF                | TGACTCAAGAATCTTTCCAGCA                                                   |
| asl1930-qR                | AGCCCAAGAATACTTACCGACA                                                   |
| alr2902-qF                | TCTTCCCAAATCGGTTTCACA                                                    |
| alr2902-qR                | CGGCTATAAGTCCGTTGGGG                                                     |
| alr3234-qF                | TCAGGGGAAGTTATGTATCAGGA                                                  |
| alr3234-qR                | GCAGTAAAACGCAAGCCCAA                                                     |
| hetP-qF                   | TGCACTACATTCCCTACCGC                                                     |
| hetP-qR                   | ACTTAAGCAACTGGACGGCAT                                                    |

\*Oligonucleotides are shown in the 5' to 3' direction.
